# Supplementary material
Source: MDPI journal article supplement (https://www.mdpi.com/2071-1050/6/4/1913)
Supplement: s1 [file s1]

## Sheet: Introduction
This file gives the supplementary material for the paper "Evaluating the sustainability of a small-scale low-input organic vegetable supply system in the United Kingdom"
It consist of
1. Detailed description of crop management for the model systems M-Low and M-High
2. Detailed description of the background data used for the model distribution system

## Sheet: 1. M-Low and M-High 
1. Detailed description of crop management for the model systems M-Low and M-High
Color legend
Data common for M-High and M-Low
Data is specific for M-Low
Data is specific for M-High
Data used for emergy analysis for M-Low
Data used for emergy analysis for M-High
1. Field opperation - diesel and natural gas usage per ha - same for M-Low and M-High
	Data from [2]		Early potatoes	Main crop potatoes	Carrot	cabbages	Cauliflower	parsnip	beetroot	Onions	Leeks	Squash	Courgettes	Lettuce	Red clover
								Number of passes per year [5]
Terms used in [2]		Unit														Terms used in [5]
Tillage, ploughing/CH U	14.8	kg diesel/ha	1	1	1	1	1	1	1	1	1	1	1	1	1	Primary cultivation
Tillage, rotary cultivator/CH U	14.11	kg diesel/ha	1	1	1	1	1	1	1	1	1	1	1	1	1	Secondary cultivation
Soil separation/ha/CH U (bedforming/ridging)	14.112	kg diesel/ha	1	1	1			1	1		2					ridging
Tillage, hoeing and earthing-up, potatoes/CH U	3.6	kg diesel/ha	2	2												Ridge up and knock down
Destoning (same as harvesting potatoes)	28.14	kg diesel/ha	1	1												Destoning
Potato planting/CH U	8.9	kg diesel/ha	1	1												potao planting
Planting/CH U	16.8	kg diesel/ha				1	1			1	1	1	1	1		Planting
Sowing/CH U	3.82	kg diesel/ha			1			1	1						1	Precision drill
Flaming/ha/CH U Diesel use	1.764	kg diesel/ha			1			1	1	1	1					Flaming
Flaming/ha/CH U Natural gas use (MJ)	4994	MJ NG/ha			1			1	1	1
Hoeing/CH U	3.28	kg diesel/ha			2	3	3	1	2	1	2	2	2	2		Finger weeder + brush weeder
Tillage, cultivating, chiselling/CH U	15.52	kg diesel/ha	1	1												Chain harrow
Tillage, currying, by weeder/CH U	1.6	kg diesel/ha
Tillage, harrowing, by rotary harrow/CH U	11.49	kg diesel/ha
Tillage, rolling/CH U	3.18	kg diesel/ha						1	1							Rolling
Mowing, by rotary mower/CH U	3.4	kg diesel/ha													2	Mowing
potato haulm cutting	4.79	kg diesel/ha		1
Harvesting, by complete harvester, beets/CH U	103.49	kg diesel/ha							1
Harvesting, by complete harvester, potatoes/CH U	28.14	kg diesel/ha	1	1	1			1		1	1
Application of plant protection products, by field sprayer/CH U	1.76	kg diesel/ha				2	2							1
Hand harvest	1.76	kg diesel/ha				1	1					1	1	1
Diesel use kg/ha	kg		140.922	150.712	83.306	60.83	60.83	83.206	161.836	78.894	110.398	54.03	54.03	55.79	39.53
Natural gas use	mj		0	0	4994	0	0	4994	4994	4994	0	0	0	0	0
Additional energy use - ONLY M-LOW
								Number of passes per year [5]
Irrigation (diesel)	3.78	kg diesel/ha	1	1								1	1	1
Irrigation electricity	880	kWh/ha	1	1								1	1	1
Fertilizing by broadcaster	5.29	kg diesel/ha													1
Solid manure loading and spreading, by hydraulic loader and spreader	0.000531	kg diesel/kg spread														Kg spread
Cold storage of courgettes and lettuce [3]	62.3333	kWh/t produce											7	6		t produce
potatoe grading	1	kwh/ton pot	10	15												ton graded
Electricity use, Only irrigation			880	880	0	0	0	0	0	0	0	880	880	880		kWh
Other electricity use			10	15	0	0	0	0	0	0	0	0	436.333	374	0	kWh
Diesel use			3.78	3.78	0	0	0	0	0	0	0	3.78	3.78	3.78	5.29	Kg
Additional energy use - ONLY M-HIGH
Irrigation (diesel)	3.78	kg diesel/ha	1	1	1	1	1			1	1	1	1	1		m3 water/ha
Irrigation electricity	880	kWh/ha	1	1	1	1	1			1	1	1	1	1		number of passes
Fertilizing by broadcaster	5.29	kg diesel/ha													1	number of passes
Solid manure loading and spreading, by hydraulic loader and spreader	0.000531	kg diesel/kg spread	25700	25700		10000	10000			25000				25000		Kg spread
Cold storage od courgettes and lettuce [3]	62.3333	kWh/t produce											13	9.6
potatoe grading	1	kwh/ton pot	20	40												ton graded
Transport, tractor and trailer	0.04	kg diesel/tkm	257	257	0	100	100	0	0	250	0	0	0	250	0	tkm
Electricity use, Only irrigation			880	880	880	880	880	0	0	880	880	880	880	880	0	kWh
Other electricity use			20	40	0	0	0	0	0	0	0	0	810.333	598.4	0	kWh
Diesel use			27.7067	27.7067	3.78	13.09	13.09	0	0	27.055	3.78	3.78	3.78	27.055	5.29	Kg
Total energy use for each crop - per ha - M-Low
M- Low Diesel use per ha			144.702	154.492	83.306	60.83	60.83	83.206	161.836	78.894	110.398	57.81	57.81	59.57	44.82	kg
M- Low electricity use per ha			890	895	0	0	0	0	0	0	0	880	1316.33	1254	0	kWh
M- Low Natural gas use per ha			0	0	4994	0	0	4994	4994	4994	0	0	0	0	0	Mj
Total energy use for each crop - per ha - M-High
M- High Diesel use per ha			168.629	178.419	87.086	73.92	73.92	83.206	161.836	105.949	114.178	57.81	57.81	82.845	44.82	kg
M- High electricity use per ha			900	920	880	880	880	0	0	880	880	880	1690.33	1478.4	0	kWh
M- High Natural gas use per ha			0	0	4994	0	0	4994	4994	4994	0	0	0	0	0	Mj
Whole systems - Energy use per ha multiplied with areas grown with each crop																Data used for emergy assessment
M-Low areas [6]			0.416458	0.832917	0.41236	0.262555	0.232422	0.209351	0.354977	0.352235	0.475802	0.168744	0.876676	1.72605	1.58014	7.90068	ha
M-Low total diesel use			60.2623	128.679	34.352	15.9712	14.1382	17.4193	57.4481	27.7892	52.5276	9.75508	50.6806	102.821	70.8217	642.665	kg
M-Low electricity use			370.648	745.46	0	0	0	0	0	0	0	148.495	1154	2164.46	0	4583.06	kWh
M- Low Natural gas use			0	0	2059.33	0	0	1045.5	1772.76	1759.06	0	0	0	0	0	6636.64	MJ
Diesel use (only irrigation)			1.57421	3.14842	0	0	0	0	0	0	0	0.637852	3.31384	6.52446	0	15.1988	kg
Elctricity use (only irrigation)			366.483	732.967	0	0	0	0	0	0	0	148.495	771.475	1518.92	0	3538.34	kWh
Electricity use (other than irrigation)			4.16458	12.4937	0	0	0	0	0	0	0	0	382.523	645.542	0	1044.72	kWh
Diesel use (only field opperations inlculding spread of manure)			58.6881	125.531	34.352	15.9712	14.1382	17.4193	57.4481	27.7892	52.5276	9.11723	47.3668	96.2962	70.8217	627.466	kg
M-High areas [6]			0.208229	0.312344	0.123708	0.105022	0.154948	0.0697838	0.118326	0.140894	0.158601	0.0632789	0.472056	1.07878	0.751492	3.75746	ha
M-High diesel consumption			35.1134	55.728	10.7732	7.76322	11.4538	5.80643	19.1494	14.9276	18.1087	3.65815	27.2896	89.3715	33.6819	332.825	kg
M-High electricity consumption			187.406	287.356	108.863	92.4193	136.354	0	0	123.987	139.568	55.6854	797.932	1594.87	0	3524.44	kWh
M- High Natural gas use per ha			0	0	617.798	0	0	348.5	590.919	703.624	0	0	0	0	0	2260.84	MJ
Diesel use (only irrigation)			0.787106	1.18066	0.467616	0.396983	0.585704	0	0	0.532579	0.59951	0.239194	1.78437	4.07779	0	10.6515	kg
Electricity use (Only irrigation)			183.242	274.862	108.863	92.4193	136.354	0	0	123.987	139.568	55.6854	415.41	949.326	0	2479.72	kWh
Electricity use (other than irrigation)			4.16458	12.4937	0	0	0	0	0	0	0	0	382.523	645.542	0	1044.72	kWh
Diesel use (only field opperations inlculding spread of manure)			32.1857	51.3364	10.3056	6.94615	10.2483	5.80643	19.1494	12.986	17.5092	3.41896	25.5052	74.5059	33.6819	303.585	kg
Diesel use (only tranport of manure)			2.1406	3.21089	0	0.420088	0.619792	0	0	1.40894	0	0	0	10.7878	0	18.5881	kg
Seed and seedlings			Early potatoes	Main crop potatoes	Carrot	cabbages	Cauliflower	parsnip	beetroot	Onions	Leeks	Squash	Courgettes	Lettuce	Red clover
Seed (same for M-Low and M-High)	Kg/ha		2500	2500	5			5	7						15
Seedlings (same for M-Low and M-High)	pcs/ha					60000	30000			75000	100000	10000	10000	125000
M-Low - total potato seed			1041.15	2082.29												3123.44	kg seed potatoe
M-Low - total seed					2.0618	0	0	1.04676	2.48484	0	0	0	0	0	23.702	29.2954	kg seed
M-Low - total seedlings			0	0	0	15753.3	6972.66	0	0	26417.6	47580.2	1687.44	8766.76	215756	0	322934	pcs of seedlings
M-High - total potato seed			520.573	780.859												1301.43	kg seed potatoe
M-High - total seed					0.61854	0	0	0.348919	0.82828	0	0	0	0	0	11.2724	13.0681	kg seed
M-High - total seedlings					0	6301.32	4648.44	0	0	10567	15860.1	632.789	4720.56	134847	0	177578	pcs of seedlings
Use of agricultural fleece and propagation trays																Total
Fleece Low	(ha)				0.41236	0.262555						0.0843719	0.438338			1.19762	ha
Fleece High	(ha)				0.123708	0.105022						0.0316395	0.236028			0.496398	ha
Propagation tray (low) (41 kg/ha) [4]	kg					10.7648	9.52931			14.4416	19.5079	6.9185	35.9437	70.768		167.874	kg
Propagation tray (high)(41 kg/ha) [4]	kg					4.3059	6.35287			5.77665	6.50262	2.59444	19.3543	44.23		89.1168	kg
Summary of results
		M-Low	M-High			M-Low	M-High
Total diesel use	kg	642.665	332.825		MJ	27698.9	14344.7
Diesel use for field opperations	kg	627.466	303.585		MJ	27043.8	13084.5		43.1	MJ/kg
Diesel use for irrigation	kg	15.1988	10.6515		MJ	655.068	459.08
Electricity use for irrigation	kWh	3538.34	2479.72		MJ	12738	8926.98
Other elctricity use	kwh	1044.72	1044.72		MJ	3761	3761
diesel use for tranport of manure	kg	0	18.5881		MJ	0	801.147
NG use (only flaming)	MJ	6636.64	2260.84		MJ	6636.64	2260.84
References:
[1] Kägi T, Bockstaller C, Gaillard G, et al. Multicriteria comparison of RA and LCA toxicity methods with focus on pesticide application strategies. In: Proceedings of the 6th International Conference on LCA in the Agri-Food Sector – Towards a sustainable management of the Food chain (eds Nemecek T and Gaillard G), Zurich, November 12–14, 2008, pp.169-177: Agroscope ART.
[2] Nemecek T and Kägi T. Life Cycle Inventories of Swiss and European Agricultural Production Systems. Final report ecoinvent V2.0 No.15a. Report no. No. 15a.
[3] Milài Canals L. LCA methodology and modelling considerations for vegetable production and consumption, CES Working Papers 02/07, ISSN:1464-8083, Published by Centre for Environmental Strategy (CES), University of Surrey.
[4] Lillywhite R, Chandler D, Grant W, et al. Environmental Footprint and Sustainability of Horticulture (including Potatoes) – A Comparison with other Agricultural Sectors. Final report produced for the Department for Environment, Food and Rural Affairs., 2007.
[5] Lampkin N, Measures M and Padel S. 2011/12 Organic Farm Management Handbook. 9th edition, ed. Hamstead Marshall: Hamstead Marshall, 2011.
[6] Table 2 from corresponding paper

## Sheet: 2. Distribution model
2. Detailed description of the background data used for the model distribution system
Key values used for distribution model
	Value	unit	reference	comment
Distance from farm to RDC	200	km	[1]
Distance from RDC to retailer	50	km	[1]
Distance from retailer to home	6.4	km	[1]
Retentional time in RDC	5	days	[1]
Retention time at Retailer	2	days	[1]
Diesel use, transport to RDC and retailer	22.9	ml/euro pallet-km	[2]	Chilled single drop, 32 t artic
Electricity use at RDC	0.00059	kWh/l/d	[1]	Wholsale cold storage (original reference Nielsen, 2003)
Energy use at retail	0.027	mj/kg/d	[1] not original reference	Ambient temperature. 44% electricity, 56% natural gas.
Avereag shopping basket	28	kg	[1]
Car milage	15	km/l
Average passengers per bus	30	persons	[1]
Bus milage	2.5	km/l	[1]
share of trips done by car	58	%	[1]
share of trips done by bus	8	%	[1]
Size of euro pallet	1.53649	m3	[2]
Specific volume of potatos, carrots, parsnips and beetroots	1.3	l/kg	[1]	based on specific volume for potatoes
Specific volume of cabbage, cauliflower, leeks, squash and courgettes	5	l/kg	[1]	based on specific volume for broccoli
Specific volume of onions	1.6	l/kg	[1]
Specific volume of lettuce	7.1	l/kg	[1]
Foodwaste at RDC, potatoes, carrots, parsnips and beetroots	29	%	[3]	Storage and packing loss, based on mean value for potato
Foodwaste at RDC, Cabbages, cauliflower, leeks, squash and courgettes	0	%	[3]	Storage and packing loss, based on mean value for broccoli
Foodwaste at RDC, onions	9	%	[3]	Storage and packing loss, mean value
Foodwaste at RDC, lettuce	2	%	[3]	Storage and packing loss, mean value
Foodwaste at retail, potatoes, carrots, parsnips and beetroots	2	%	[3]	Based on mean value for potato
Foodwaste at retail, Cabbages, cauliflower, leeks, squash and courgettes	2	%	[3]	Based on mean value for broccoli
Foodwaste at retail, onions	1	%	[3]	Mean value
Foodwaste at retail, lettuce	2	%	[3]	Mean value
References
[1] Milài Canals L. LCA methodology and modelling considerations for vegetable production and consumption, CES Working Papers 02/07, ISSN:1464-8083, Published by Centre for Environmental Strategy (CES), University of Surrey
[2] Defra. Greenhouse Gas Impacts of Food Retailing, Defra Project code FO405, http://randd.defra.gov.uk/Default.aspx?Menu=Menu&Module=More&Location=None&Completed=0&ProjectID=15805
[3] WRAP. Fruit and vegetable resource maps; Mapping fruit and vegetable waste through the retail and wholesale supply chain. (RSC-008).
SUMMARRY OF ENERGY USE THROUGHOUT DISTRIBUTION MODEL (based on tables below)
Total energy use in model distribution system						3.6	MJ/kWh
Tranport to RDC, Diesel	MJ	23375.8	651.863	l		34.8	MJ/l	gasoline
Storage in RDC, electricity	MJ	2322.18	645.051	kwh		35.86	MJ/l	diesel
Tranport to retailers, diesle	MJ	5499.17	153.351	l
Storage in retailers, elctricity	MJ	1284.16	356.71	kWh
Storage in retailers, Natural gas	MJ	4637.34	4637.34	MJ
Transport to home by car, gasoline	MJ	16212.2	465.868	l
Tranport to home by bus, diesle	MJ	450.055	12.5503	l
Total disel	MJ	29325	817.765	l
Total gasoline	MJ	16212.2	465.868	l
Total elctricity	MJ	3606.34	1001.76	kWh
Total NG	MJ	4637.34	4637.34	mj
Pallet-km to RDC	5509.92
Pallet-km to Retail	1295.48
CALCULATION OF ENERGY USE THOUGHOUT DISTRIBUTION CHAIN FOR TOTAL OUTPUT
	Farm gate output (t)	Diesel use, transport 200 km to RDC (l)	Electricity use, 5 days storage at RDC (kWh)	RDC gate output (t)	Diesel use, transport 50 km to retailer (l)	Electricity use, storage at retailer (kWh)	NG use, storage at retailer (MJ)	Retail gate output (t)	Gasoline use, tranport to home by car (l)	Diesle use, transport to home by bus (l)		Food chain loss
Potatoes	16.6583	64.5546	63.8847	11.8274	11.4584	78.0609	346.503	11.4526	101.219	2.72681		0.3125
Carrots	6.1854	23.9697	23.721	4.39163	4.25463	28.9848	128.66	4.25246	37.5837	1.01249		0.3125
Cabbages	5.2511	78.2628	77.4537	5.2511	19.5657	34.6573	591.667	5.13295	45.3655	1.22213		0.0225
Cauliflower	3.71875	55.4246	54.8516	3.71875	13.8561	24.5438	419.01	3.63508	32.1272	0.865496		0.0225
Parsnips	2.09351	8.11281	8.02862	1.48639	1.44002	9.8102	43.5463	1.43929	12.7206	0.342688		0.3125
Beetroots	3.54977	13.7561	13.6134	2.52034	2.44171	16.6342	73.8374	2.44047	21.5691	0.581064		0.3125
Onions	3.52235	16.7991	16.6255	3.20533	3.8218	21.1552	115.571	3.17892	28.0956	0.756885		0.0975
Leeks	2.85481	42.5483	42.1084	2.85481	10.6371	18.8417	321.665	2.79058	24.6634	0.664423		0.0225
Squash	2.53116	37.7246	37.3346	2.53116	9.43114	16.7056	285.198	2.47421	21.8673	0.589097		0.0225
Courgettes	6.13673	91.4623	90.5168	6.13673	22.8656	40.5024	691.455	5.99866	53.0167	1.42825		0.0225
Lettuce (littel gem)	10.3563	219.248	216.912	10.1233	53.5788	66.8136	1620.22	9.91614	87.6398	2.36099		0.0425
	62.8582	651.863	645.051	54.0469	153.351	356.71	4637.34	52.7114	465.868	12.5503
					805.215	1001.76			931.736
Same table other units
	Farm gate output (t)	Diesel use, transport 200 km to RDC (MJ)	Electricity use, storage at RDC (MJ)	RDC gate output (t)	Diesel use, transport 50 km to retailer (MJ)	Electricity use, storage at retailer (MJ)	NG use, storage at retailer (MJ)	Retail gate output (t)	Gasoline use, tranport to home by car (MJ)	Diesle use, transport to home by bus (MJ)
Potatoes	16.6583	2314.93	229.985	11.8274	410.9	281.019	346.503	11.4526	3522.43	97.7834
Carrots	6.1854	859.555	85.3956	4.39163	152.571	104.345	128.66	4.25246	1307.91	36.3079
Cabbages	5.2511	2806.5	278.833	5.2511	701.626	124.766	591.667	5.13295	1578.72	43.8256
Cauliflower	3.71875	1987.53	197.466	3.71875	496.882	88.3576	419.01	3.63508	1118.03	31.0367
Parsnips	2.09351	290.925	28.903	1.48639	51.6393	35.3167	43.5463	1.43929	442.676	12.2888
Beetroots	3.54977	493.295	49.0081	2.52034	87.5598	59.8832	73.8374	2.44047	750.604	20.8369
Onions	3.52235	602.417	59.8517	3.20533	137.05	76.1587	115.571	3.17892	977.726	27.1419
Leeks	2.85481	1525.78	151.59	2.85481	381.446	67.8303	321.665	2.79058	858.286	23.8262
Squash	2.53116	1352.8	134.404	2.53116	338.201	60.1403	285.198	2.47421	760.981	21.125
Courgettes	6.13673	3279.84	325.86	6.13673	819.96	145.809	691.455	5.99866	1844.98	51.2171
Lettuce (littel gem)	10.3563	7862.25	780.885	10.1233	1921.34	240.529	1620.22	9.91614	3049.87	84.665
	62.8582	23375.8	2322.18	54.0469	5499.17	1284.16	4637.34	52.7114	16212.2	450.055
Total tkm by truck	15274
Total person-km	6988.02
CALCULATION OF CROP BY CROP ENERGY CONSUMPTION THOUGHOUT CHAIN PER TON OF PRODUCE DELIVERED AT CONSUMERS
	Farm gate production needed to deliver one t of produce to consumers	On-farm processing cooling (kWh/t produce)	kg/pallet	Transportenergy consumption (ml/pallet-km)	Diesel use per (ml/tkm)	Distance to RDC (km)	Tranport, pallet-km	Transport to RDC, Diesel use (l/t at consumers)	Storage at RDC (days)	Specific volume of packed vegetables (l/kg)	Specific volume of packed vegetables (kg/m3)	Energy consumption (kWh/l/d)	Food waste	Storage at RDC, electricity consumption (kWh/t)	Transport to retailer (km)	Tranport, pallet-km	Transport to RDC, Diesel use (l/t at consumers)	Storage at retailer (days)	Storage at retail, energy use (MJ/kg/d)	Food waste	Storage at retail, El. use (kWh/t)	Storage at retail, NG use (MJ/t/day)	Distance to home (avg UK) (km)	Avg. Shopping basket weight (kg)	Fuel efficiency of car (km/l)	Transport to home by car, energy use (l/t)	share of trips made by car	Tranport to home bu car, Gasoline use (l/t)	Fuel efficiency of bus (km/l)	Passengers per bus	Transport to home by bus, energy use (l/t)	share of trips made by bus	Tranport to home by bus, diesel use (l/t)	Total diesel use (l/t)	Total gasolin use (l/t)	Total electricity use (kWh/t)	Total NG use (MJ/t)
Potatoes	1.45455		1181.87	22.9	19.3761	200	246.143	5.63668	5	1.3	769.2	0.00059	0.29	3.835	50	43.6904	1.00051	2	0.027	0.0225	6.6	30.24	6.4	28	15	15.2381	0.58	8.8381	2.5	30	2.97619	0.08	0.238095	6.87528	8.8381	10.435	30.24
Carrots	1.45455		1181.87	22.9	19.3761	200	246.143	5.63668	5	1.3	769.2	0.00059	0.29	3.835	50	43.6904	1.00051	2	0.027	0.0225	6.6	30.24	6.4	28	15	15.2381	0.58	8.8381	2.5	30	2.97619	0.08	0.238095	6.87528	8.8381	10.435	30.24
Cabbages	1.02302		307.298	22.9	74.5204	200	665.814	15.2471	5	5	200	0.00059	0	14.75	50	166.453	3.81178	2	0.027	0.0225	6.6	30.24	6.4	28	15	15.2381	0.58	8.8381	2.5	30	2.97619	0.08	0.238095	19.297	8.8381	21.35	30.24
Cauliflower	1.02302		307.298	22.9	74.5204	200	665.814	15.2471	5	5	200	0.00059	0	14.75	50	166.453	3.81178	2	0.027	0.0225	6.6	30.24	6.4	28	15	15.2381	0.58	8.8381	2.5	30	2.97619	0.08	0.238095	19.297	8.8381	21.35	30.24
Parsnips	1.45455		1181.87	22.9	19.3761	200	246.143	5.63668	5	1.3	769.2	0.00059	0.29	3.835	50	43.6904	1.00051	2	0.027	0.0225	6.6	30.24	6.4	28	15	15.2381	0.58	8.8381	2.5	30	2.97619	0.08	0.238095	6.87528	8.8381	10.435	30.24
Beetroots	1.45455		1181.87	22.9	19.3761	200	246.143	5.63668	5	1.3	769.2	0.00059	0.29	3.835	50	43.6904	1.00051	2	0.027	0.0225	6.6	30.24	6.4	28	15	15.2381	0.58	8.8381	2.5	30	2.97619	0.08	0.238095	6.87528	8.8381	10.435	30.24
Onions	1.10803		960.308	22.9	23.8465	200	230.766	5.28455	5	1.6	625	0.00059	0.09	4.72	50	52.4993	1.20223	2	0.027	0.0075	6.6	30.24	6.4	28	15	15.2381	0.58	8.8381	2.5	30	2.97619	0.08	0.238095	6.72488	8.8381	11.32	30.24
Leeks	1.02302		307.298	22.9	74.5204	200	665.814	15.2471	5	5	200	0.00059	0	14.75	50	166.453	3.81178	2	0.027	0.0225	6.6	30.24	6.4	28	15	15.2381	0.58	8.8381	2.5	30	2.97619	0.08	0.238095	19.297	8.8381	21.35	30.24
Squash	1.02302		307.298	22.9	74.5204	200	665.814	15.2471	5	5	200	0.00059	0	14.75	50	166.453	3.81178	2	0.027	0.0225	6.6	30.24	6.4	28	15	15.2381	0.58	8.8381	2.5	30	2.97619	0.08	0.238095	19.297	8.8381	21.35	30.24
Courgettes	1.02302	62.3333	307.298	22.9	74.5204	200	665.814	15.2471	5	5	200	0.00059	0	14.75	50	166.453	3.81178	2	0.027	0.0225	6.6	30.24	6.4	28	15	15.2381	0.58	8.8381	2.5	30	2.97619	0.08	0.238095	19.297	8.8381	83.6833	30.24
Lettuce (littel gem)	1.04439	62.3333	216.338	22.9	105.853	200	965.513	22.1102	5	7.1	140.8	0.00059	0.0225	20.945	50	235.947	5.40319	2	0.027	0.02	6.6	30.24	6.4	28	15	15.2381	0.58	8.8381	2.5	30	2.97619	0.08	0.238095	27.7515	8.8381	89.8783	30.24
							5509.92	126.177								1295.48	29.6664
Calculation of volume of euro-pallet:
	506	329	1.53799
	488	318	1.53459
	720	469	1.53518
	1600	1042	1.53551
	320	208	1.53846
	363	236	1.53814
	375	244	1.53689
	1440	938	1.53518
Volume of euro-pallet			1.53649	[2] table 2.2
On farm cooling		Average of 3 values from CES Working paper 01/08 pp27
		Value specefic for lettuce
Transportenergy consumption (ml/pallet-km)			[2] pp 9, chilled single drop, 32 tonne artic
Distance to RDC	200	km	[1] pp 23
Storage at RDC (days)	5	days	[1] pp 23
Specific volume of packed vegetables (l/kg)			[1] pp 23
Energy consumption (kWh/l/d)	0.00059		[1] pp 24
Storage at retailer			[1] pp 24
Storage	energy use	Source and comments
Ambients temp	0.027	MJ/kg/d
Colled	0.06	MJ/l/d
Frozen	0.18	MJ/kg/d
Transport to home			[1] pp 25
References
[1] Milài Canals L. LCA methodology and modelling considerations for vegetable production and consumption, CES Working Papers 02/07, ISSN:1464-8083, Published by Centre for Environmental Strategy (CES), University of Surrey
[2] Defra. Greenhouse Gas Impacts of Food Retailing, Defra Project code FO405, http://randd.defra.gov.uk/Default.aspx?Menu=Menu&Module=More&Location=None&Completed=0&ProjectID=15805
[3] WRAP. Fruit and vegetable resource maps; Mapping fruit and vegetable waste through the retail and wholesale supply chain. (RSC-008).
